# Supplementary material for: The KiVa antibullying program in primary schools in Chile, with and without the digital game component: study protocol for a randomized controlled trial
Source: Springer Nature journal article supplement (doi:10.1186/s13063-017-1810-1), 2017-02-20
Supplement: MOESM2 [file 12078058]

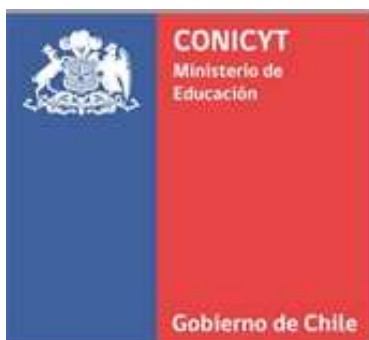

DOCUMENTO ELECTRONICO

APRUEBA ADJUDICACIÓN DE PROYECTOS DE INVESTIGACIÓN CONJUNTA CHILE-FINLANDIA EN TECNOLOGÍAS Y NUEVOS ENTORNOS DE APRENDIZAJE, CONVOCATORIA 2015, PROGRAMA DE COOPERACIÓN INTERNACIONAL DE CONICYT.

RESOLUCION EXENTO N°: 1978/2016

Santiago15/02/2016

## VISTOS:

Lo dispuesto en el DS N°491/71; DS N°97/15, ambos del Ministerio de Educación; Ley de Presupuestos del Sector Público N° 20.882 para el año 2016; DS 97/2015 del Ministerio de Educación y Resolución N° 1600 de 2008, de Contraloría General de la República, y

## CONSIDERANDO:

- a. La Resolución Exenta N°533/2015 de CONICYT, que aprobó las bases de postulación para Proyectos de Investigación Conjunta Chile-Finlandia en Tecnologías y Nuevos Entornos de Aprendizaje, Convocatoria 2015, Programa de Cooperación Internacional de CONICYT.
- b. Memorando TED N°969/2016 del Programa de Cooperación Internacional de CONICYT, que solicita emitir la Resolución de Fallo para el Concurso AKA-CONICYT en Ciencias de la Educación, Proyectos de Investigación Conjunta Chile-Finlandia en Tecnologías y Nuevos Entornos de Aprendizaje, Convocatoria 2015, y adjunta antecedentes.
- c. La Resolución Exenta N°8018/2015 de CONICYT, que aprobó la Constitución del Comité de Área del presente concurso.
- d. La convocatoria del certamen aludido, publicada en el Diario El Mercurio de Santiago, de fecha 29 de mayo de 2015.
- e. Listado total de proyectos presentados al Concurso AKA-CONICYT en Ciencias de la Educación.
- f. Proyecto declarado fuera de bases, por no contar con contraparte de Finlandia.
- g. Proyectos no seleccionados del Concurso AKA-CONICYT en Ciencias de la Educación (Anexo 2)
- h. Listado de proyectos seleccionados para adjudicación (4).
- i. Acta de selección Concurso proyectos de investigación conjunta CONICYT Chile-Academia de Finlandia en Ciencias de la Educación-Convocatoria 2015, de fecha 05 de noviembre de 2015.
- j. Acta de Selección Final CONICYT/AKA-llamado conjunto en Tecnologías y Nuevos Entornos de Aprendizaje, de diciembre de 2015.
- k. Cuadro presupuesto de los adjudicados por año.
- l. Certificado de disponibilidad presupuestaria N°07 de 13 de enero de 2016, del Departamento de Administración y Finanzas de CONICYT, que indica que se cuenta con la disponibilidad presupuestaria con la cual se podrá financiar el compromiso que se tramita en el documento.
- m. Las facultades que detenta esta Dirección Ejecutiva, de conformidad a lo señalado en el DS 491/71, el DS 97/15, ambos del Ministerio de Educación.

## RESUELVO:

1. APRUÉBASE la adjudicación del CONCURSO DE PROYECTOS DE INVESTIGACIÓN CONJUNTA CHILE-FINLANDIA EN TECNOLOGÍAS Y NUEVOS ENTORNOS DE APRENDIZAJE, CONVOCATORIA 2015, de conformidad a lo dispuesto en Acta de Selección Final CONICYT-AKA, del llamado conjunto en Tecnologías y Nuevos Entornos de Aprendizaje, de diciembre de 2015, que incluye a los siguientes proyectos:

| Ch.Code     | Title                                                                                                        | PI Chile       | Ch Institution           | PI Finland           | Fin. Institution                    | Other Researchers Ch.                                           | Aporte CONICYT (pesos chilenos) |
|-------------|--------------------------------------------------------------------------------------------------------------|----------------|--------------------------|----------------------|-------------------------------------|-----------------------------------------------------------------|---------------------------------|
| AKA-EDU/ 15 | KiVa anti-bullying program in Chile: Evaluation of effectiveness with and without the digital game component | Jorge Gaete    | Universidad de los Andes | Christina Salmivalli | University of Turku                 | Christian A. Rojas-Barahona; Professor Eduardo Valenzuela (OUC) | \$ 149.963.000                  |
| AKA-EDU/ 11 | Engaging Learning Practices in STEM: Research collaboration with Finland and Chile                           | Beatriz Ávalos | CIAE U. de Chile         | Jari M J Lavonen     | University of Helsinki,             | Patricio Cumsille; Valeria M. Cabello; xxxUribe (PUC)           | \$ 150.000.000                  |
| AKA-EDU/02  | ENHANCING LEARNING AND TEACHING FOR FUTURE COMPETENCES OF ONLINE INQUIRY IN MULTIPLE DOMAINS                 | Mario          | PUC                      | Mario Vuorikoski     | Faculty of Education, University of | Roberto González-Ibáñez                                         | € 150.000.000                   |

| ANA-EDU/ US  | (IFUCO)                        | Quintanilla   | PUC                                                                       | Iviarja vauras | Turku                                                          | (USACH)                          | → 150.000.000         |
|--------------|--------------------------------|---------------|---------------------------------------------------------------------------|----------------|----------------------------------------------------------------|----------------------------------|-----------------------|
| AKA-EDU/ 01  | Learning environments for STEM | Roberto Araya | Centro de Investigación Avanzada en Educación (CIAE), University of Chile | Jouni Viiri    | Department of Teacher Education, University of Jyväskylä (JYU) | Jorge Soto-Andrade; Raúl Gormaz; | \$ 150.000.000        |
| <b>Total</b> |                                |               |                                                                           |                |                                                                |                                  | <b>\$ 599.963.000</b> |

2. NOTIFÍQUESE por el Programa de Cooperación Internacional el resultado del certamen a todos(as) los(as) investigadores(as) responsables de los proyectos postulados en Chile y celébrense los respectivos convenios con los adjudicados.
3. El Departamento de Administración y Finanzas imputará el gasto que irroque la presente resolución, a la cuenta presupuestaria que corresponda.
4. ANÓTESE por el Oficial de Partes el número y fecha de la presente resolución, que complementa, en el campo "DESCRIPCIÓN" ubicado en el Repositorio de Archivo Institucional, en el documento digital de la Resolución Exenta N°533/2015 de CONICYT.
5. REMÍTASE copia de la presente resolución a Presidencia, al Programa de Cooperación Internacional, al Departamento de Administración y Finanzas, al Departamento Jurídico y a la Oficina de Partes.
6. DÉJASE constancia que contra el presente acto administrativo procede el recurso de reposición de conformidad a lo previsto en la Ley N° 19.880, que establece las Bases de los Procedimientos Administrativos que rigen los Actos de los Órganos de la Administración del Estado, sin perjuicio de otros medios de impugnación contemplados por el ordenamiento jurídico.

ANÓTESE, REFRÉNDESE, COMUNÍQUESE Y NOTIFÍQUESE

| UNIDAD DE PRESUPUESTO - CONTABILIDAD |                           |
|--------------------------------------|---------------------------|
| FECHA                                | 11-02-2016                |
| ITEM                                 | 24.01.223                 |
| CENTRO DE COSTO                      | COOPERACION INTERNACIONAL |
| ANALISTA                             | Alejandra Moraga Vásquez  |

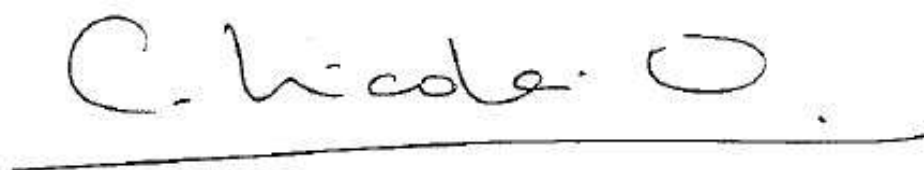

CHRISTIAN NICOLAI ORELLANA  
Director(a) Ejecutivo  
DIRECCION EJECUTIVA

CNO // MMF / SQG / mvc

DISTRIBUCION:

CATALINA PALMA - Coordinador(a) de Coop. Inter. en Investigación Conjunta - RELACIONES INTERNACIONALES  
RICARDO CONTADOR - Coordinador(a) de Finanzas Unidad de Coop. Internacional - RELACIONES INTERNACIONALES  
INGRID MARLENE TAPIA - Secretaria Dirección - RELACIONES INTERNACIONALES  
RODRIGO MONSALVE - Director(S) - RELACIONES INTERNACIONALES  
OFICINA DE - Buzón Oficina de Partes - GESTION DE PERSONAS

Firmado Electrónicamente en Conformidad con el Artículo 2º letra F y G de la Ley 19.799
