# Supplementary material for: The KiVa antibullying program in primary schools in Chile, with and without the digital game component: study protocol for a randomized controlled trial
Source: Springer Nature journal article supplement (doi:10.1186/s13063-017-1810-1), 2017-02-20
Supplement: MOESM4 [file 12078058]

## Academy of Finland

Funding decision

|                       |                                                                                                              |
|-----------------------|--------------------------------------------------------------------------------------------------------------|
| <b>Name</b>           | Salmivalli, Christina                                                                                        |
| <b>Organisation</b>   | TY                                                                                                           |
| <b>Project title</b>  | KiVa anti-bullying program in Chile: Evaluation of effectiveness with and without the digital game component |
| <b>Decision No.</b>   | 294199                                                                                                       |
| <b>Decision date</b>  | 16.11.2015                                                                                                   |
| <b>Funding period</b> | 01.01.2016 - 31.12.2018                                                                                      |
| <b>Funding</b>        | 120 000                                                                                                      |

### Project description

In Chile, there is an urgent need for evidence-based prevention of bullying. Despite some government-supported initiatives to help schools deal with bullying, no randomized controlled trials (RCTs) testing the effectiveness of existing anti-bullying programs have been done so far. The aim of the proposed project is to develop a culturally appropriate version of the KiVa antibullying program and to test its effectiveness in low-income primary schools in Santiago, Chile. Furthermore, it will be tested whether the digital learning environment, an anti-bullying computer game included in the Kiva program, adds to the effectiveness of the program. A randomized controlled trial will be conducted with three groups of schools: 1) the ones receiving the full KiVa program, 2) the ones receiving the KiVa program without the computer game, and 3) control schools.
